# Supplementary material for: Challenges of the movement of catalytic micromotors in blood
Source: Royal Society of Chemistry journal article supplement (doi:10.1039/c3lc41423j), 2013-01-01
Supplement: c3lc41423j.pdf [file c3lc41423j.pdf]

## Supporting Information

### **Challenges of the Movement of Catalytic Micromotors in Blood**

**Guanjia Zhao, Marlitt Viehrig, Martin Pumera\***

Division of Chemistry & Biological Chemistry, School of Physical and Mathematical  
Sciences, Nanyang Technological University, Singapore 637371, Singapore.

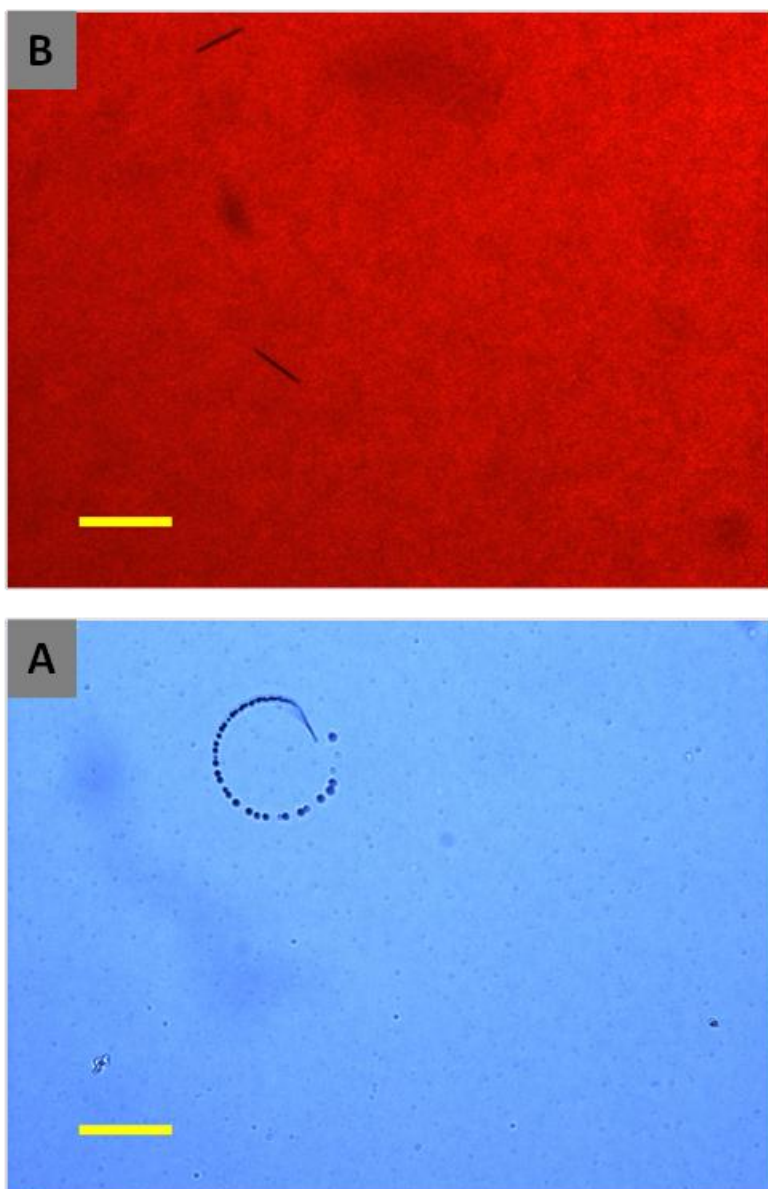

**Figure S1.** Schematics of the concept demonstrated in the paper. Motion of the microjets in (A) phosphate buffer saline solution (pH 7.2) and (B) red blood cell ( $\sim 5 \times 10^6$  cell/ $\mu\text{L}$ ) and serum mixture of concentration corresponding to that of the blood. Both solutions contained 3% (wt)  $\text{H}_2\text{O}_2$  as fuel and 1% SDS. The microjets were prepared by rolled-up technology. Scale bar indicates 100  $\mu\text{m}$ .

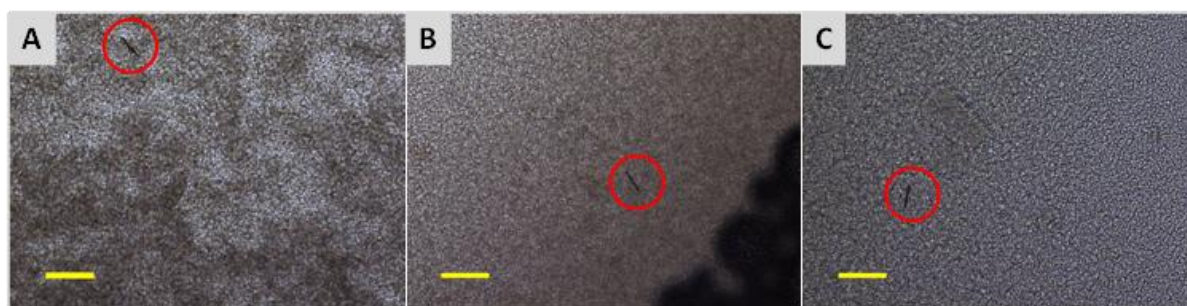

**Figure S2.** Motion of the rolled-up microjets in red blood cell ( $\sim 5 \times 10^6$  cell/ $\mu\text{L}$ ) and serum mixture of concentration corresponding to the concentration in the blood. (A) 3% (B) 6% and (C) 9% (wt)  $\text{H}_2\text{O}_2$  as fuel and 1% SDS. Scale bars indicate 100  $\mu\text{m}$ .

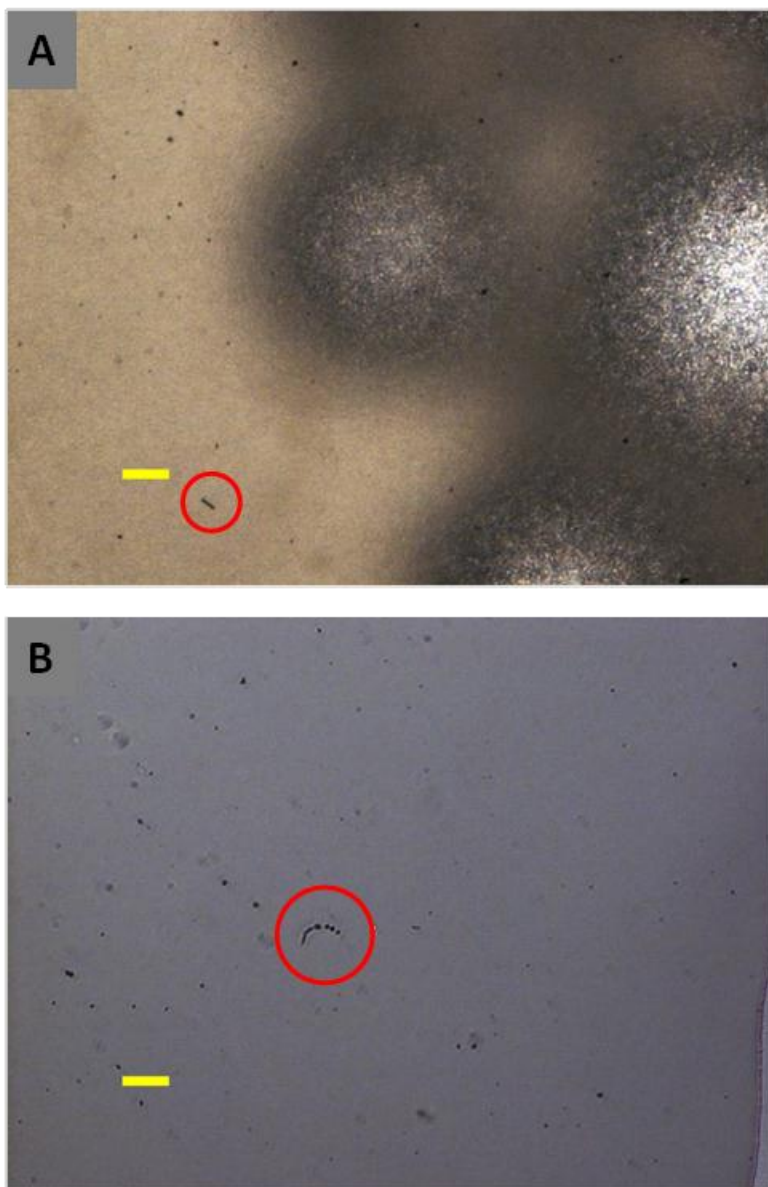

**Figure S3.** Motion of the templated- electrochemical deposition technology prepared microjet motor in (A) red blood cell ( $\sim 5 \times 10^6$  cell/ $\mu\text{L}$ ) and serum mixture of concentration corresponding to the concentration in the blood and (B) phosphate buffer saline solution (pH 7.2). Both solutions contained 3% (wt)  $\text{H}_2\text{O}_2$  as fuel and 1% SDS. Scale bars indicate 50  $\mu\text{m}$ .
